# Supplementary material for: PBRM1 Cooperates with YTHDF2 to Control HIF-1α Protein Translation
Source: Cells. 2021 Jun 8;10(6):1425. doi: 10.3390/cells10061425 (PMC8228889; doi:10.3390/cells10061425)
Supplement: Supplementary file 1 [file cells-10-01425-s001.zip › Table S1_Shmakova et al.xlsx]

## Sheet: Sheet1
The m6A Methyltransferase METTL3 Promotes Translation in Human Cancer Cells
Annotation of m6A peaks identified in A549 cells
Chromosome	Peak Start	Peak end	Gene ID	Gene Symbol	Strand	Transcription Starts	Transcription Ends
chr14	62162272	62162562	NM_181054	HIF1A	+	62162118	62214977
Annotation of m6A peaks identified in H1299 cells
Chromosome	Peak Start	Peak end	Gene ID	Gene Symbol	Strand	Transcription Starts	Transcription Ends
chr14	62162118	62162578	NM_181054	HIF1A	+	62162118	62214977
chr14	62207392	62207949	NM_181054	HIF1A	+	62162118	62214977
Summary of METTL3 target genes based on 4SU-PAR-CLIP				293T
Gene symbol	Refseq	Entrez ID	3UTR	5UTR	TTS	Exon	Intron	Non-coding	Promoter-TSS	Sum
HIF1A	NM_001530,NM_181054,NM_001243084	3091	0	1	0	0	0	0	0	1
However, HIF1a is absent in			Summary of m6A peaks that show statistically significant decrease in the m6A-IP/Input ratio upon METTL3 knockdown (P < 0.05)
2015 nature Linder	Single-nucleotide-resolution mapping of m6A and m6Am throughout the transcriptome
No 5'UTR site identified by CIMS or CITS in 293T
2015 Lee nature	eIF3 targets cell-proliferation messenger RNAs for translational activation or repression
HIF1a was not detected in eIF3 PARC-CLIP in HEK293
5' UTR m6A Promotes Cap-Independent Translation
m6A residues located within 5′ UTRs in untreated HepG2 cells, heat-shocked HepG2 cells, and UV-treated HepG2 cells.
HIF1a
Cnt	none
HS	chr14	62162443	62162444	MACS_peak_9364	47	+	NM_181054	326	5utr
UV	chr14	62162424	62162425	MACS_peak_5473	43	+	NM_181054	307	5utr
Comprehensive Analysis of mRNA Methylation Reveals Enrichment in 3′ UTRs and near Stop Codons
no peaks for HIF1a identified in either mouse brain or HEK293
Topology of the human and mouse m6A RNA methylomes revealed by m6A-seq				Domisini
mouse liver
id	chr	txStart	txEnd	strand	geneSymbol	desc	factor_iscoding	MouseLiver_meanexpquant	MouseLiver_peaksnum	MouseLiver_peakspos	MouseLiver_peaksexonnum	MouseLiver_peaksexlengths	MouseLiver_peaksscores	MouseLiver_annotpeakspos
iduc007nwq.1	chr12	75009016	75047878	+	Hif1a	hypoxia inducible factor 1, alpha subunit	coding	0.766355	0	NA	NA	NA	NA	NA
HepG2
id	chr	txStart	txEnd	strand	geneSymbol	desc	factor_iscoding	HumanHEPG2_meanexpquant	HumanHEPG2_peaksnum	HumanHEPG2_peakspos	HumanHEPG2_peaksexonnum	HumanHEPG2_peaksexlengths	HumanHEPG2_peaksscores	HumanHEPG2_annotpeakspos	HumanHEPG2HeatShock_meanexpquant	HumanHEPG2HeatShock_peaksnum	HumanHEPG2HeatShock_peakspos	HumanHEPG2HeatShock_peaksexonnum	HumanHEPG2HeatShock_peaksexlengths	HumanHEPG2HeatShock_peaksscores	HumanHEPG2HeatShock_annotpeakspos	HumanHEPG2UV_meanexpquant	HumanHEPG2UV_peaksnum	HumanHEPG2UV_peakspos	HumanHEPG2UV_peaksexonnum	HumanHEPG2UV_peaksexlengths	HumanHEPG2UV_peaksscores	HumanHEPG2UV_annotpeakspos	HumanHEPG2HGF_meanexpquant	HumanHEPG2HGF_peaksnum	HumanHEPG2HGF_peakspos	HumanHEPG2HGF_peaksexonnum	HumanHEPG2HGF_peaksexlengths	HumanHEPG2HGF_peaksscores	HumanHEPG2HGF_annotpeakspos	HumanHEPG2IFN_meanexpquant	HumanHEPG2IFN_peaksnum	HumanHEPG2IFN_peakspos	HumanHEPG2IFN_peaksexonnum	HumanHEPG2IFN_peaksexlengths	HumanHEPG2IFN_peaksscores	HumanHEPG2IFN_annotpeakspos	HumanBrain_meanexpquant	HumanBrain_peaksnum	HumanBrain_peakspos	HumanBrain_peaksexonnum	HumanBrain_peaksexlengths	HumanBrain_peaksscores	HumanBrain_annotpeakspos
iduc001xfq.1	chr14	61231991	61284729	+	HIF1A	hypoxia-inducible factor 1, alpha subunit	coding	0.941855	0	NA	NA	NA	NA	NA	0.992206	1	105	1	319	6.18621	TxStart	0.989197	1	97	1	319	8.07649	TxStart	0.98121	0	NA	NA	NA	NA	NA	0.981249	0	NA	NA	NA	NA	NA	0.855081	0	NA	NA	NA	NA	NA
2014 Shwartz	Perturbation of m6A Writers Reveals		Two Distinct Classes of mRNA		Methylation at Internal and 50 Sites
human
chr	position	strand	UCSC id	txStart	txEnd	name2	geneSymbol	Distance peak to consensus	Classifier score	Confidence category	POI score siWTAP	POI score siMETTL3	POI score siControl	POI score shWTAP	POI score shWTAP	POI score shMETTL14 (1) rep 2	POI score shMETTL14 (3) rep2	POI score shMETTL14 (1) rep1	POI score shMETTL14 (3) rep1	POI score shMETTL3	POI score shMETTL3 (rep2)	POI score shGFP	POI score shGFP	POI score shGFP	POI score hESC	POI score NPC	POI score fibroblasts + Dox	POI score Fibroblasts -Dox	POI score iPSC
chr14	62207740	+	uc001xfq.2	62162118	62214977	NM_001530	HIF1A	-69	32.0455	high	2.65666	3.66802	2.95268	2.66407	3.18123	3.22312	3.83515	3.78142	3.557	3.09571	3.68033	3.49816	3.20999	3.00364	4.22717	3.83655	3.83064	3.26057	3.3942
chr14	62162294	+	uc001xfq.2	62162118	62214977	NM_001530	HIF1A	35	45.1108	intermediate	2.00986	2.25775	1.66924	4.80615	4.23846	3.57422	2.42752	2.8551	3.93409	4.44503	5.00537	3.74013	3.42009	5.53332	2.58294	1.67469	2.75463	2.53141	2.13548
Mouse brain
chr12	75043168	+	uc007nwq.2	75008853	75048517	NM_010431	Hif1a	-3	22.9022	high	3.507	3.76387	3.89642	4.26036	3.37437	4.52032	4.81586	3.94027	3.76763	3.17113	4.25261	3.90962	3.86042
chr12	75009040	+	uc007nwq.2	75008853	75048517	NM_010431	Hif1a	16	36.6972	intermediate	3.05608	2.62646	2.68711	2.07897	2.87337	2.63729	2.05363	2.82917	2.4436	4.11863	2.22016	1.89702	2.52264
chr12	75043251	+	uc007nwq.2	75008853	75048517	NM_010431	Hif1a	-27	37.8503	intermediate	2.55696	3.65353	3.27916	3.24188	3.23082	3.27818	3.30957	2.82305	3.69007	1.6437	3.31717	2.6059	2.81279
no m6A peak identified in the TSS in either models
2015 Wang	YTHDF2 in heat shock
MEFs_Cnt
Hif1a	NM_010431	chr12	+	73926579	73926658	73926599	501	4.52047	CDS
Hif1a	NM_010431	chr12	+	73926739	73928056	73927991	655	7.35097	CDS
Hif1a	NM_010431	chr12	+	73940516	73941691	73940575	1900	6.53103	CDS
Hif1a	NM_010431	chr12	+	73941812	73941999	73941839	2108	4.75713	CDS
Hif1a	NM_010431	chr12	+	73942120	73942239	73942169	2330	12.0468	CDS
Hif1a	NM_010431	chr12	+	73947370	73947489	73947404	4635	9.12789	3UTR
MEFs_HS
Hif1a	NM_010431	chr12	+	73940476	73941691	73940547	1872	12.6051	CDS
Hif1a	NM_010431	chr12	+	73947170	73947289	73947212	4443	119.052	3UTR
Batista	m6A in embryonic stem cells
Chromosome	Start	End	Gene Biotype	Ensembl Gene ID	Gene Symbol
first run
chr14	62162380	62162480	protein_coding	ENSG00000100644	HIF1A
chr14	62207822	62207922	protein_coding	ENSG00000100644	HIF1A
all run
chr14	62162380	62162480	protein_coding	ENSG00000100644	HIF1A
chr14	62207822	62207922	protein_coding	ENSG00000100644	HIF1A
Mouse brain
Chr	Peak Start	Peak End	RefSeq Accession	Name	Location
chr12	75041425	75041600	NM_010431	Hif1a	CDS
chr12	75043000	75043163	NM_010431	Hif1a	CDS
chr12	75043163	75043325	NM_010431	Hif1a	CDS
Category	Gene symbol	PAR-CLIP / Peak sum					Ribsome profiling / change fold-log2(siYTHDF2/siControl)			mRNA lifetime / change fold-log2(siYTHDF2/siControl)
I: Non-targets. II: CLIP targets. III: CLIP+IP targets.		rep1	rep2	rep3	RIP / Enrich-log2(IP/Input)	rep2-ribominus input	RPF(Source Data to Figure 2b)	mRNA input (Source Data to Figure 2a)	Translation Efficiency (Source Data to Extended Data Figure 3b)	mRNA lifetime ( Source Data to Figure 2c-d)
II	HIF1A	2	3	3	rep1-polyA input	-1.3323	-0.0236827	0.246111	-0.269794	-0.274333
Group	Gene symbol	PAR-CLIP / peak sum		RIP / log2(IP/input)	0.318654	Ribosome profiling / log2(siYTHDF1/siControl) average of two biological replicates			mRNA lifetime profiling / log2(siYTHDF1/siControl)
		repl.1	repl.2	repl.1-poly(A) input		Ribosome bound fragments	mRNA input	Translation Efficiency	Half life time (t1/2)*	* Blank cell: the t1/2 of the transcript is not within 0-96 hours
CLIP only target	HIF1A	1	3	-0.345434	repl.2-ribominus input	-0.973243	0.132769	-1.10601	-0.378106
CLIP only target	HIF1AN	2	2	0.753708	-0.732448	0.89022	0.232926	0.657293	0.0582821
					0.892626
Table S2. Lists of DNA-binding proteins encoded by m6A modified transcripts. Related to Figure 1.
	Expression value						m6A modification status (1 means with m6A peak in the defined region, 0 means without m6A peak)					iPSC					NSC					SC
							ESC				3' UTR	TcSS	5' UTR	CDS	TsTS	3' UTR	TcSS	5' UTR	CDS	TsTS	3' UTR	TcSS	5' UTR	CDS	TsTS	3' UTR
RefSeq GeneID	ESC_FPKM	iPSC_FPKM	NSC_FPKM	SC_FPKM			TcSS	5' UTR	CDS	TsTS	0	0	0	1	0	0	0	0	1	0	0	0	0	1	0	0
HIF1A	1.71992	20.694	30.0249	35.5484	Entropy		0	0	0	0
					1.65964
